# Supplementary material for: Lysosomal acid lipase regulates VLDL synthesis and insulin sensitivity in mice
Source: Springer Nature journal article supplement (doi:10.1007/s00125-016-3968-6), 2016-05-06
Supplement: MOESM2 [file 10103146]

## Electronic Supplementary Material

### Lysosomal acid lipase regulates VLDL synthesis and insulin sensitivity in mice

by B. Radovic et al.

#### ESM Figure 1 (relates to Figure 2)

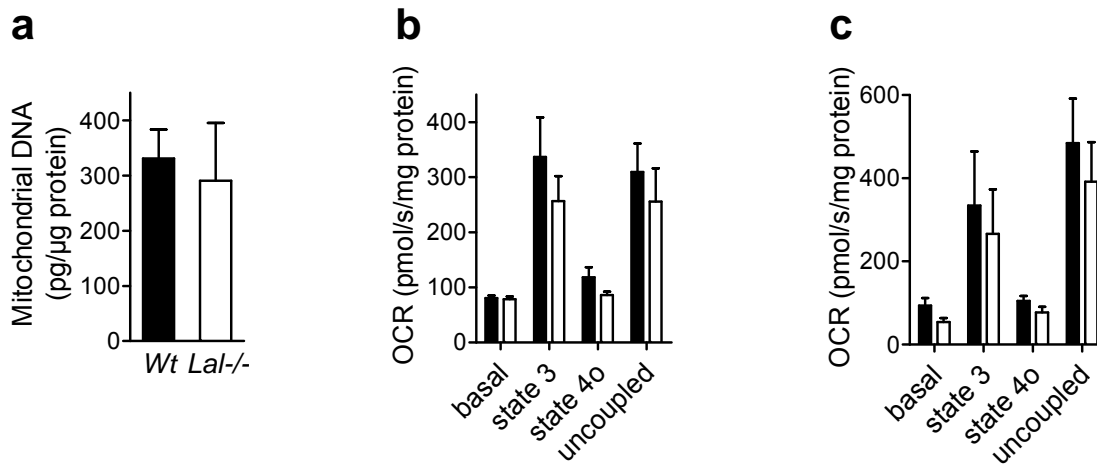

**ESM Fig. 1: Comparable mitochondrial number and *ex vivo* oxygen consumption in *Lal*<sup>-/-</sup> livers.** (a) DNA concentrations of liver mitochondria isolated from 8-10 weeks old *Wt* (black bar) and *Lal*<sup>-/-</sup> mice (white bar) (n=6). Oxygen consumption rates of extracted mitochondria using (b) glutamate/malate and (c) glutamate/pyruvate as substrates, respectively. Data represent mean values (n=4) + SD.
