# Supplementary material for: Lysosomal acid lipase regulates VLDL synthesis and insulin sensitivity in mice
Source: Springer Nature journal article supplement (doi:10.1007/s00125-016-3968-6), 2016-05-06
Supplement: MOESM3 [file 10103146]

## Electronic Supplementary Material

### Lysosomal acid lipase regulates VLDL synthesis and insulin sensitivity in mice

by B. Radovic et al.

#### ESM Figure 2 (relates to Figure 3)

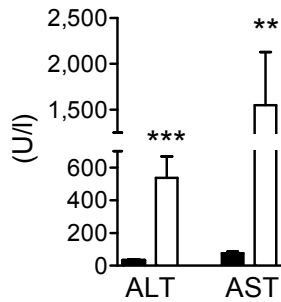

**ESM Fig. 2: Increased alanine aminotransferase (ALT) and aspartate aminotransferase (AST) concentrations in *Lal*<sup>-/-</sup> mice.** Plasma values of ALT and AST in 10-14 weeks old *Wt* (black bar) and *Lal*<sup>-/-</sup> (white bar) mice. Data represent mean values (n=5) + SD. \*\* $p \leq 0.01$ , \*\*\* $p \leq 0.001$ .
