# Supplementary material for: Lysosomal acid lipase regulates VLDL synthesis and insulin sensitivity in mice
Source: Springer Nature journal article supplement (doi:10.1007/s00125-016-3968-6), 2016-05-06
Supplement: MOESM4 [file 10103146]

## Electronic Supplementary Material

### Lysosomal acid lipase regulates VLDL synthesis and insulin sensitivity in mice

by B. Radovic et al.

#### ESM Figure 3 (relates to Figure 5)

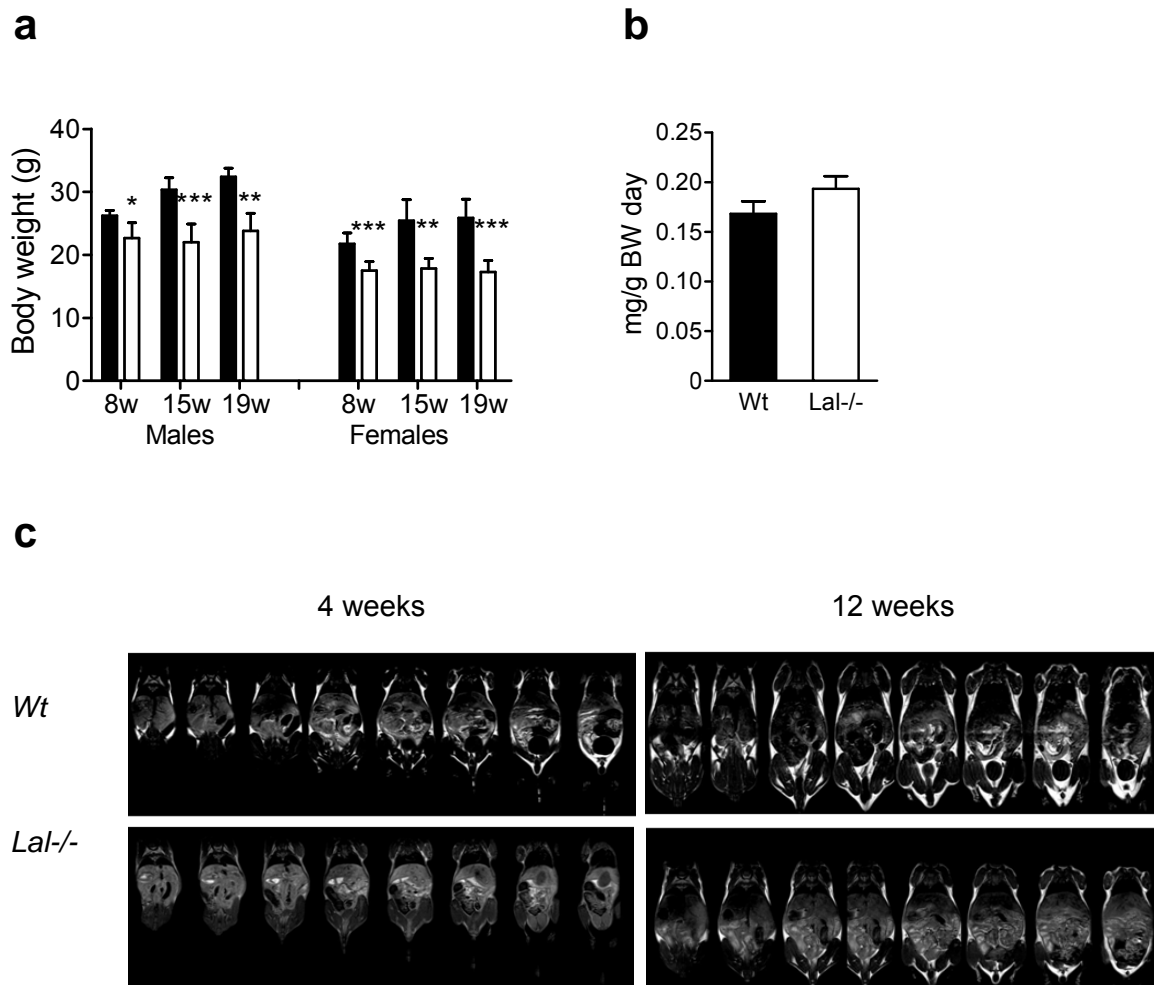

**ESM Fig. 3: Decreased body weight and fat mass in *Lal*<sup>-/-</sup> mice.** (a) Body weights of 8, 15, and 19 weeks old *Wt* (black bars; n=3-8) and *Lal*<sup>-/-</sup> (white bars; n=4-8) mice. (b) Food intake normalized to body weight of 8 weeks old *Wt* (black bar; n=6) and *Lal*<sup>-/-</sup> (white bar, n=6) mice. Animals were housed individually and had ad libitum access to standard chow diet and water. Data represent mean values + SD. \* $p < 0.05$ , \*\* $p \leq 0.01$ , \*\*\* $p \leq 0.001$ . (c) MRI cross-sectional images of 4 week old *Wt* and *Lal*<sup>-/-</sup> littermate; the same mice were scanned again at the age of 12 weeks. Bright areas represent adipose tissues.
